# Supplementary material
Source: MDPI journal article supplement (https://www.mdpi.com/1099-4300/17/3/1477)
Supplement: s1 [file s1]

Supplementary materials

**Table S1.** RD values for fragments in 2EQY calculated according Kyte-Doolittle scale (RD-KD) and “fuzzy oil drop model (RD-FOD). The results are also listed for selected secondary folds and unstructured fragments: α—α-helix, β—β-twist, and L—loop. “C” denotes the complete molecule, as listed in PDB (87-208 aa), while “P” corresponds to the fragment subjected to fuzzy oil drop analysis (95-190 aa) following elimination of N- and C-terminal fragments. Values listed in boldface indicate departures from the idealized distribution.

|  | **Secondary Fragment** | ***RD-KD*** | | ***RD-FOD*** | |
| --- | --- | --- | --- | --- | --- |
|  |  | C | P | C | P |
| 2EQY |  | 0.497 | 0.471 | 0.481 | 0.471 |
| Unstructured | **87-95** | **0.905** |  | **0.843** |  |
|  | **α 96-115** | **0.518** | 0.361 | **0.549** | 0.466 |
|  | L 116-120 | 0.362 | 0.409 | 0.383 | **0.519** |
|  | β 121 – 124 | 0.253 | 0.300 | 0.278 | 0.243 |
|  | β 125 – 128 | 0.151 | 0.232 | 0.166 | 0.198 |
|  | **α 129-141** | **0.589** | **0.519** | **0.544** | **0.517** |
|  | α 142-149 | 0.465 | 0.367 | 0.381 | 0.355 |
|  | α 151-159 | 0.314 | 0.292 | 0.328 | 0.258 |
|  | L 160-164 | 0.197 | 0.279 | 0.350 | 0.148 |
|  | **α 165-178** | **0.593** | **0.552** | **0.579** | **0.514** |
|  | **α 179-188** | **0.738** | **0.704** | **0.805** | **0.570** |
| Unstructured | **189-208** | 0.472 |  | **0.538** |  |
| β-hairpin | 120-129 | 0.299 | 0.292 |  | 0.258 |
| DisProt | 115-128 | 0.316 | 0.358 | 0.384 | 0.449 |

**Table S2.** RD values for fragments in 2JXJ calculated according Kyte-Doolittle scale (RD-KD) and “fuzzy oil drop model (RD-FOD). Values listed in boldface indicate departures from the idealized distribution: α—α-helix, β—β-structural fragment, and L—loop.

|  | **Secondary Fragment** | ***RD-KD*** | ***RD-FOD*** |
| --- | --- | --- | --- |
| 2JXJ | Complete Molecule | 0.473 | 0.453 |
|  | **α 84-102** | **0.519** | **0.505** |
|  | **β 108-110** | 0.428 | **0.577** |
|  | β 113-115 | 0.232 | 0.156 |
|  | **α 117-129** | **0.533** | **0.606** |
|  | α 130-137 | 0.338 | 0.333 |
|  | α 138-147 | 0.229 | 0.256 |
|  | **α 153-163** | **0.621** | **0.582** |
|  | α 166-174 | 0.446 | 0.477 |
| β-hairpin | 107-115 | 0.277 | 0.233 |
| DisProt | 103-116 | 0.453 | 0.428 |
| **EXON** | **81-121** | **0.540** | **0.507** |

**Table S3.** RD values for fragments in 2YQE calculated according Kyte-Doolittle scale (RD-KD) and “fuzzy oil drop model (RD-FOD). The results are also listed for selected secondary folds and unstructured fragments (while 2YQE is not present in the DisProt database, we have identified fragments which do not participate in its globular structure): α—α-helix, β—β-structural fragment and L—loop. Values listed in boldface indicate departures from the idealized distribution.

|  | **Secondary Fragment** | ***RD-KD*** | ***RD-FOD*** |
| --- | --- | --- | --- |
| 2YQE | Complete Molecule | **0.500** | **0.524** |
| Unstructured | **72-79** | **0.922** | **0.903** |
|  | **α 80-97** | **0.601** | **0.654** |
|  | β103-106 | 0.284 | 0.264 |
|  | β 107-110 | 0.223 | 0.179 |
|  | **α 111-123** | **0.519** | **0.573** |
|  | α 124-131 | 0.382 | 0.277 |
|  | α 133-141 | 0.274 | 0.362 |
|  | L 142-147 | 0.368 | 0.364 |
|  | **α 148-160** | **0.505** | **0.504** |
|  | α 161-168 | 0.484 | 0.493 |
| β-hairpin | 103-110 | 0.249 | 0.219 |
| Unstructured | 98-110 | 0.375 | 0.344 |

**Table S4.** RD values for fragments in 2RQ5 calculated according Kyte-Doolittle scale (RD-KD) and “fuzzy oil drop model (RD-FOD). “C” and “P” correspond to the complete molecule (610-730 aa) and its part (610-710 aa) respectively. The results are also listed for individual secondary folds and for disordered fragments: α—α-helix, β—β-structural fragment, and L—loop. Values listed in boldface indicate departures from the idealized distribution.

|  | **Secondary Fragment** | ***RD-KD*** | | ***RD-FOD*** | |
| --- | --- | --- | --- | --- | --- |
|  |  | C | P | C | P |
| 2RQ5 | Chain | 0.475 | 0.479 | 0.444 | 0.417 |
|  | α 620-636 | 0.331 | 0.392 | 0.427 | 0.426 |
| Unstructured | **637-643** | 0.295 | 0.301 | **0.539** |  |
|  | **β644-646** | **0.656** | **0.683** | **0.690** | **0.628** |
|  | **β649-651** | **0.554** | **0.568** | **0.656** | **0.642** |
|  | **α 652-663** | 0.493 | 0.417 | **0.556** | 0.424 |
|  | α 665-672 | 0.310 | 0.184 | 0.263 | 0.332 |
|  | α674-682 | 0.220 | 0.256 | 0.207 | 0.246 |
|  | L 683-689 | 0.423 | 0.355 | 0.437 | 0.427 |
|  | α690-701 | 0.330 | 0.316 | 0.339 | 0.304 |
|  | **α 702-709** | **0.660** | **0.743** | **0.600** | **0.601** |
|  | α710-727 | 0.486 |  | 0.405 |  |
| β-hairpin | 643-652 | **0.692** | **0.681** | **0.716** | **0.687** |

**Table S5.** *RD* values for fragments in 2E6R calculated according Kyte-Doolittle scale (*RD-KD*) and “fuzzy oil drop model (RD-FOD). The results are also listed for selected secondary folds and unstructured fragments (while 2E6R is not present in the DisProt database, we have identified fragments not associated with the globular structure): α—α-helix, β—β-structural fragment. Values listed in boldface indicate departures from the idealized distribution. “P” denotes the fragment 25-69 aa.

|  | **Secondary Fragment** | ***RD-KD*** | | ***RD-FOD*** | |
| --- | --- | --- | --- | --- | --- |
|  |  | C | P | C | P |
| 2E6R |  | **0.580** | 0.412 | **0.649** | 0.420 |
| Unstructured | **1-19** | **0.749** |  | **0.730** |  |
|  | α 25-31 | 0.245 | 0.283 | 0.216 | 0.293 |
| Zn2+ (34) | **β 32-34** | 0.375 | 0.416 | **0.510** | 0.490 |
|  | **β 39-41** | **0.740** | **0.777** | **0.861** | **0.584** |
| **Unstructured** | **42-60** | 0.469 | 0.355 | **0.637** | 0.289 |
| Zn2+ (60,63) | α 61-69 | 0.365 | 0.349 | 0.421 | 0.445 |
| β-hairpin | **31-43** | **0.647** | **0.553** | **0.807** | **0.606** |
| Unstructured | **79-92** | **0.844** |  | **0.795** |  |

**Table S6.** RD values for fragments in 2MA5 calculated according Kyte-Doolittle scale (RD-KD) and “fuzzy oil drop model (RD-FOD). (2MA5 is not present in DisProt database): α—α-helix, β—β-structural fragment, and L—loop. Values listed in boldface indicate departures from the idealized distribution.

|  | **Secondary Fragments** | ***RD-KD*** | ***RD-FOD*** |
| --- | --- | --- | --- |
| 2MA5 | Complete Molecule | 0.333 | 0.368 |
| Unstructured Zn2+ 4, 9 | 1-17 | 0.215 | 0.290 |
| Zn2+ 22 | β 18-22 | 0.379 | 0.206 |
| Zn2+ 26 | L 23-27 | 0.368 | 0.230 |
| Zn2+ 31 | β 28-31 | 0.147 | 0.279 |
| Zn2+ 34 | α 32-36 | 0.392 | 0.486 |
|  | α 38-44 | 0.314 | 0.316 |
|  | L 45-48 | 0.300 | 0.301 |
| Zn2+ 49, 52 | α 49-55 | 0.376 | 0.327 |
| β-hairpin | 18-32 | **0.522** | 0.333 |

**Table S7.** RD values for fragments in 2KGG calculated according Kyte-Doolittle scale (RD-KD) and “fuzzy oil drop model (RD-FOD). The results are also listed for selected secondary folds and unstructured fragments (2KGG is not present in the DisProt database): α—α-helix, β—β-structural fragment, and L—loop. Values listed in boldface indicate departures from the idealized distribution.

|  | **Secondary Fragment** | ***RD-KD*** | ***RD-FOD*** |
| --- | --- | --- | --- |
| 2KGG | Complete Molecule | 0.388 | 0.436 |
| Unstructured | 1-16 | 0.234 | 0.279 |
|  | **β 17-21** | 0.469 | **0.523** |
| Zn2+ 25 | **L 22-26** | **0.522** | **0.572** |
| Zn2+ 30 | β 27-31 | 0.308 | 0.238 |
|  | L 32-36 | 0.344 | 0.366 |
|  | α 37-44 | 0.188 | 0.288 |
| β-hairpin | **17-31** | **0.589** | **0.649** |

**Table S8.** RD values for fragments in 2KGI calculated according Kyte-Doolittle scale (RD-KD) and “fuzzy oil drop model (RD-FOD). The results are also listed for selected secondary folds and unstructured fragments (2KGI is not present in the DisProt database): α—α-helix, β—β-structural fragment, and L—loop. Values listed in boldface indicate departures from the idealized distribution.

|  | **Secondary Fragment** | ***RD-KD*** | ***RD-FOD*** |
| --- | --- | --- | --- |
| 2KGI-AB | Complex | 0.388 | 0.435 |
| Unstructured | 1-14 | 0.234 | 0.365 |
| L 17-21 | β 17-21 | 0.483 | 0.319 |
| L 28, 31 Zn2+ 30 | **β 27-31** | 0.288 | **0.589** |
|  | L 32-36 | 0.235 | 0.243 |
| L 41, 44-45 | α 37-44 | 0.242 | 0.285 |
|  | L 45-52 | 0.426 | 0.463 |
| 2KGI-A | CHAIN | 0.364 | 0.491 |
| Unstructured | 1-14 | 0.212 | 0.308 |
| L 17-21 | **β 17-21** | 0.459 | **0.587** |
| L 28, 31 Zn2+ 30 | β 27-31 | 0.284 | 0.347 |
|  | L 31-36 | 0.259 | 0.435 |
| L 41, 44-45 | α 37-44 | 0.290 | 0.344 |
|  | L 45-52 | 0.417 | 0.466 |
| β-hairpin | **14-31** | 0.460 | **0.582** |

**Table S9.** RD values for fragments in 3GL6 calculated according Kyte-Doolittle scale (RD-KD) and “fuzzy oil drop model (RD-FOD). *RD* values are given for 3GL6 (A chain), for its selected secondary folds and for disordered fragments. This protein is listed in the DisProt database, with the entire molecule flagged as disordered. Two unstructured fragments are also distinguished: α—α-helix, β—β-structural fragment, and L—loop. “C” and “P” correspond to the complete molecule (1608-1659 aa) and its part (1608-1644 aa) respectively. Values listed in boldface indicate departures from the idealized distribution.

|  | **Secondary Fragment** | ***RD-KD*** | | ***RD-FOD*** | |
| --- | --- | --- | --- | --- | --- |
|  | Chain | C | P | C | P |
| 3GL6 | Complete Molecule | **0.614** | **0.677** | **0.623** | **0.698** |
| Unstruct.4 Zn2+ | **1608-1623** | **0.667** | **0.654** | **0.654** | **0.641** |
| 1 Zn2+; 4 L | **β 1624-1628** | **0.563** | **0.738** | **0.604** | **0.766** |
| 1 L | **β 1634-1638** | **0.333** | **0.676** | **0.563** | **0.755** |
|  | **α 1639-1642** | **0.564** | **0.822** | **0.708** | **0.872** |
| 3 L | α 1644-1651 | 0.243 |  | 0.269 |  |
| 2 Zn2+ | **L 1652-1659** | **0.616** |  | **0.593** |  |
| β-hairpin | **1608-1644** | **0.624** | **0.676** | **0.591** | **0.743** |
| DisProt | **1609-1659** | **0.601** | **0.761** | **0.662** | **0.698** |
